# Supplementary material for: A Review of Remote Sensing Applications for Determining Lake Water Quality
Source: Preprints.org preprint supplement (doi:10.20944/preprints202309.0489.v1), 2023-09-07
Supplement: Supplementary file 1 [file supplementary]

# A review of remote sensing applications for determining lake water quality - Supplement

Anja Batina <sup>1</sup> and Andrija Krtalić <sup>1,\*</sup>

<sup>1</sup> Faculty of Geodesy, University of Zagreb, 10000 Zagreb, Croatia; [abatina@geof.hr](mailto:abatina@geof.hr); [andrija.krtalic@geof.unizg.hr](mailto:andrija.krtalic@geof.unizg.hr)

\* Correspondence: [andrija.krtalic@geof.unizg.hr](mailto:andrija.krtalic@geof.unizg.hr)

**Abstract:** Remote sensing methods have the potential to improve lake water quality monitoring and decision-making in water management. This reviews introduces novel findings in the field of optically active water quality parameters using remote sensing. It summarizes existing retrieval methods (analytical, semi-analytical, empirical, semi-empirical, and artificial intelligence/machine learning (AI/ML)), examines measurement methods used to determine concentration of specific water quality parameters, summarizes satellite systems that enable temporal data for understanding the state of the lake with focus on water quality parameters, and proposes enhancements for future research of lake water quality using remote sensing. As part of this review, eight optically active biological and physical water quality parameters were analyzed, including chlorophyll- $\alpha$  (chl- $\alpha$ ), transparency (Secchi disk depth (SDD)), colored dissolved organic matters (CDOM), turbidity (TUR), electrical conductivity (EC), surface salinity (SS), total suspended matter (TSM), and water temperature (WT). The research proposes a shift from point-based data representation to a more reliable raster representation and encourages optimizing grid selection for in situ measurements by combining hydrodynamic model with remote sensing methods. This review presents a comprehensive summary of the bands, band combinations, and band equations per sensor for eight optically active water quality parameters as listed in Tables A1-A8. The review's findings indicate that use of remotely sensed data is an effective method for estimating water quality parameters in lakes, with a significant increase in global utilization. The review highlights potential solutions and limitations to the challenges of remote sensing water quality determination in lakes.

**Keywords:** remote sensing; lake; water quality; water quality parameters; spaceborne sensors; inland waters

## Appendix A

### Selected remote measurements of selected water quality parameters using different sensors and spectral bands, band ratios and band combinations

Table A1. Selected remotely measurements of chl- $\alpha$  using various sensors and spectral bands, band ratios, and band combinations.

| Band Combination            | Sensor       | Band/Equation                                             | Reference |
|-----------------------------|--------------|-----------------------------------------------------------|-----------|
| Ratio between green and red | Landsat-5 TM | B2 (520-600 nm)/B3 (630-690 nm)                           | [33]      |
|                             | Landsat-5 TM | B3 (630-690 nm)/B2 (520-600 nm)                           | [57,58]   |
|                             | PROBA-CHRIS  | $R_{706}/R_{561}$                                         | [59]      |
| Ratio between NIR and red   | HICO         | $(1/R_{686}-1/R_{703}) \cdot R_{735}$                     | [60]      |
|                             | HICO         | $R_{708}/\text{avg}(R_{662}, R_{668})$                    | [61]      |
|                             | PROBA-CHRIS  | $R_{706}/R_{672}$                                         | [62]      |
|                             | MODIS        | $R_{743-753}/R_{662-672}$                                 | [63,64]   |
|                             | MERIS        | $(1/R_{660-670}-1/R_{700-730}) \cdot R_{740-760}$         | [63]      |
|                             | MERIS        | $(1/R_{660-670}-1/R_{703.75-713.75}) \cdot R_{750-757.5}$ | [64]      |

|                              |       |                 |                                                                                                                         |         |
|------------------------------|-------|-----------------|-------------------------------------------------------------------------------------------------------------------------|---------|
|                              |       | MERIS           | $(1/R_{665}-1/R_{708}) \cdot R_{753}$                                                                                   | [65,66] |
|                              |       | MERIS           | $R_{708}/R_{665}$                                                                                                       | [65,66] |
|                              |       | AISA            | $R_{699-705}/R_{670-677}$                                                                                               | [67]    |
|                              |       | AISA            | $(R_{700}-R_{781})/(R_{662}-R_{781})$                                                                                   | [35]    |
|                              |       | MERIS           | $R_{720-740}/R_{660-670}$                                                                                               | [68]    |
|                              |       | MERIS           | $(1/R_{660-670}-1/R_{700-720}) \cdot R_{720-740}$                                                                       | [68]    |
|                              |       | HyperOCR        | $(1/R_{672}-1/R_{712}) \cdot R_{749}$                                                                                   | [69]    |
|                              |       | MERIS           | $R_{672}/R_{704}$                                                                                                       | [70]    |
|                              |       | MODIS           | $R_{665}/R_{748}$                                                                                                       | [70]    |
|                              |       | AVIRIS          | $R_{708}/R_{676}$                                                                                                       | [71]    |
|                              |       | MERIS           | $(1/R_{660}-1/R_{692}) \cdot R_{740}$                                                                                   | [72]    |
|                              |       | MERIS           | $(1/R_{622}-1/R_{693}) \cdot (1/R_{740}-1/R_{705})$                                                                     | [72]    |
|                              |       | Sentinel-3 OLCI | $(1/R_{665}-1/R_{705}) \times R_{752}$                                                                                  | [73]    |
|                              |       | HyMap           | $R_{705}/R_{678}$                                                                                                       | [74]    |
|                              |       | CASI            | $R_{705}/R_{678}$                                                                                                       | [74]    |
|                              |       | AISA            | $R_{700}/R_{670}$                                                                                                       | [75]    |
|                              |       | CASI-2          | $R_{710}/R_{670}$                                                                                                       | [76]    |
|                              |       | AISA            | $R_{710}/R_{670}$                                                                                                       | [76]    |
|                              |       | MODIS           | $R_{700}/R_{670}$                                                                                                       | [77]    |
|                              |       | MERIS           | $B9 (703.75-713.75 \text{ nm})/B7 (660-670 \text{ nm})$                                                                 | [78]    |
|                              |       | MERIS           | $R_{709}/R_{665}$                                                                                                       | [79]    |
|                              |       | AISA            | $(1/R_{666}-1/R_{704}) \cdot R_{723}$                                                                                   | [80]    |
|                              |       | AISA            | $R_{704}/R_{666}$                                                                                                       | [80]    |
|                              |       | MERIS           | $(B9 (703.75-713.75 \text{ nm})-B7 (660-670 \text{ nm})) \cdot (B9 (703.75-713.75 \text{ nm})+B7 (660-670 \text{ nm}))$ | [81]    |
|                              |       | Sentinel-2 MSI  | $R_{705}/R_{665}$                                                                                                       | [82]    |
|                              |       | Sentinel-3 OLCI | $R_{665}/R_{709}$                                                                                                       | [82]    |
| Ratio between green and blue |       | MERIS           | $(B5 (555-565 \text{ nm})-B2 (437.5-447.5 \text{ nm})) \cdot (B5 (555-565 \text{ nm})+B2 (437.5-447.5 \text{ nm}))$     | [81]    |
|                              |       | EO-1 Hyperion   | $R_{490}/R_{550}$                                                                                                       | [83]    |
|                              |       | EO-1 Hyperion   | $R_{467}/R_{559}$                                                                                                       | [84]    |
|                              |       | HICO            | $R_{444}/R_{553}, R_{490}/R_{553}, R_{507}/R_{553}$                                                                     | [85]    |
|                              |       | SeaWiFS         | $R_{443}/R_{555}, R_{490}/R_{555}, R_{510}/R_{555}$                                                                     | [86]    |
|                              |       | Landsat-5 TM    | $B2 (520-600 \text{ nm})/B1 (450-520 \text{ nm})$                                                                       | [87]    |
|                              |       | WorldView-2     | $B1 (400-450 \text{ nm})/B3 (510-580 \text{ nm})$                                                                       | [30]    |
| Ratio between blue and red   |       | Landsat-7 ETM+  | $B1 (450-515 \text{ nm})/B3 (630-690 \text{ nm})$                                                                       | [88,89] |
|                              |       | ALOS-AVNIR-2    | $B3 (610-690 \text{ nm})/B1 (420-500 \text{ nm})$                                                                       | [90]    |
|                              |       | Landsat-8 OLI   | $(R_{630-680}-R_{433-453})/(R_{630-680}+R_{433-453})$                                                                   | [91]    |
| Single band                  | Blue  | Landsat-5 TM    | $B1 (450-520 \text{ nm})$                                                                                               | [32]    |
|                              |       | MIVIS           | $R_{440}$                                                                                                               | [92]    |
|                              |       | MODIS           | $B8 (405-420 \text{ nm})$                                                                                               | [93]    |
|                              | Red   | PROBA-CHRIS     | $R_{650-690}$                                                                                                           | [94]    |
|                              | Green | Landsat-5 TM    | $B2 (520-600 \text{ nm})$                                                                                               | [95]    |
|                              |       | Daedalus ATM    | $B3 (520-600 \text{ nm})$                                                                                               | [96]    |
|                              |       | MODIS           | $B11 (526-536 \text{ nm})$                                                                                              | [93]    |
|                              |       | MODIS           | $B4 (545-565 \text{ nm})$                                                                                               | [93]    |
|                              | NIR   | MODIS           | $B2 (840-876 \text{ nm})$                                                                                               | [93]    |

|                |                 |                                                                                                                      |           |
|----------------|-----------------|----------------------------------------------------------------------------------------------------------------------|-----------|
| Multiple bands | IKONOS          | B1 (450–530 nm), B2 (520–610 nm), B3 (640–720 nm), B4 (770–880 nm)                                                   | [97]      |
|                | Landsat-5 TM    | B1 (450-520 nm), B2 (520-600 nm), B3 (630-690 nm), B5 (1550-1750 nm), B6 (10400-12500 nm)                            | [98]      |
|                | Landsat-8 OLI   | B2 (450-510 nm), B3 (530-590 nm), B4 (630-670 nm), B5 (850-880 nm)                                                   | [99]      |
|                | Landsat-5 TM    | B1 (450-520 nm), B2 (520-600 nm)                                                                                     | [100]     |
|                | Landsat-5 TM    | B1 (450-520 nm), B3 (630-690 nm)                                                                                     | [101–103] |
|                | Landsat-5 TM    | B1 (450-520 nm), B2 (520-600 nm), B3 (630-690 nm)                                                                    | [102,104] |
|                | Landsat-5 TM    | B1 (450-520 nm), B3 (630-690 nm), B4 (760-900 nm)                                                                    | [102]     |
|                | Landsat-5 TM    | B1 (450-520 nm), B2 (520-600 nm), B3 (630-690 nm), B4 (760-900 nm)                                                   | [100]     |
|                | MODIS           | B1 (620-670 nm), B4 (545-565 nm)                                                                                     | [93]      |
|                | Landsat-8 OLI   | B1 (433–453 nm), B2 (450-515 nm), B3 (525-600 nm), B4 (630-680 nm)                                                   | [105]     |
|                | MERIS           | B7 (664 nm), B8 (680.5 nm), B9 (708 nm)                                                                              | [106]     |
|                | CHRIS-PROBA     | B8 (581.345-596.935 nm), B9 (613.7-627.1 nm), B10 (641.27-656.25 nm), B11 (661.44-672.12 nm), B12 (672.15-683.21 nm) | [107]     |
|                | MODIS           | B1 (645 nm), B2 (859 nm), B3 (469 nm), B4 (555 nm)                                                                   | [108]     |
|                | Landsat-5 TM    | B1 (450-520 nm), B2 (520-600 nm), B3 (630-690 nm), B4 (760-900 nm), B5 (1550-1750 nm), B7 (2080-2350 nm)             | [109]     |
|                | PlanetScope     | B2 (465-515 nm), B4 (547-583 nm), B6 (650-680 nm), B8 (845-885 nm)                                                   | [110]     |
|                | Sentinel-2 MSI  | B4 (649.6-679.6 nm), B5 (697.1-711.1 nm), B6 (733.5-747.5 nm), B11 (1568.7-1658.7 nm), B12 (2115.4-2289.4)           | [110]     |
|                | Landsat-8 OLI   | B5 (850-880 nm), B6 (1570-1650 nm), B7 (2110-2290 nm)                                                                | [110]     |
|                | Sentinel-3 OLCI | B1 (392.5-407.5 nm), B4 (485-495 nm), B6 (555-565 nm), B8 (660-670 nm), B9 (670-677.5 nm)                            | [111]     |

Table A2. Selected remotely measurements of TSM using various sensors and spectral bands, band ratios, and band combinations

| Band Combination            | Sensor       | Band/Equation                   | Reference |
|-----------------------------|--------------|---------------------------------|-----------|
| Ratio between green and red | Landsat-5 TM | B3 (630-690 nm)/B2 (520-600 nm) | [58]      |
|                             | PROBA-CHRIS  | $R_{680}/R_{530}$               | [59]      |
|                             | WorldView-2  | B3 (510-580 nm)/B4 (585-625 nm) | [30]      |
| Ratio between NIR and green | SPOT-HRV     | $R_{850}/R_{550}$               | [182]     |
|                             | Landsat ETM+ | $R_{850}/R_{550}$               | [182]     |
|                             | IRS          | $R_{850}/R_{550}$               | [182]     |
|                             | ALOS-AVNIR-2 | B4 (760-890 nm)/B2 (520-600 nm) | [90]      |
|                             | AISA         | $R_{850}/R_{550}$               | [75]      |
|                             | PlanetScope  | B1(431-452 nm)/B4 (547-583 nm)  | [183]     |

| Ratio between blue and green |       | PlanetScope         | B2 (465-515 nm)/B4 (547-583 nm)                                    | [183] |
|------------------------------|-------|---------------------|--------------------------------------------------------------------|-------|
| Single band                  | NIR   | AISA                | R <sub>705-714</sub>                                               | [67]  |
|                              |       | MODIS               | R <sub>748</sub>                                                   | [184] |
|                              |       | DEIMOS-1 (GEOSAT-1) | B3 (755-906 nm)                                                    | [185] |
|                              |       | Sentinel-2 MSI      | B7 (773-793 nm)                                                    | [186] |
|                              |       | Sentinel-2 MSI      | R <sub>705</sub>                                                   | [82]  |
|                              | Red   | Landsat-5 TM        | B3 (630-690 nm)                                                    | [187] |
|                              |       | MODIS               | B1 (620-670 nm)                                                    | [188] |
|                              |       | MODIS               | R <sub>645</sub>                                                   | [189] |
|                              |       | IRS LISS-III        | B2 (620-680 nm)                                                    | [187] |
|                              |       | Landsat-5 TM        | B2 (520-600 nm)                                                    | [187] |
|                              |       | IRS-LISS-III        | B1 (520-590 nm)                                                    | [187] |
|                              | Blue  | MIVIS               | R <sub>440</sub>                                                   | [92]  |
|                              |       | MODIS               | R <sub>490</sub>                                                   | [190] |
|                              | Green | PlanetScope         | B3 (513-549 nm)/B4 (547-583 nm)                                    | [183] |
|                              |       | PlanetScope         | B4 (547-583 nm)/B3 (513-549 nm)                                    | [183] |
|                              |       | PlanetScope         | B3 (513-549 nm)                                                    | [113] |
| Multiple bands               |       | IKONOS              | B1 (450-530 nm), B2 (520-610 nm), B3 (640-720 nm), B4 (770-880 nm) | [97]  |
|                              |       | Landsat-5 TM        | B2 (520-600 nm), B3 (630-690 nm)                                   | [191] |
|                              |       | SPOT-HRV            | B1 (500-590 nm), B2 (610-680 nm)                                   | [191] |
|                              |       | Landsat-5 TM        | B3 (630-690 nm), B4 (760-900 nm)                                   | [192] |
|                              |       | Landsat-8 OLI       | B4 (630-670 nm), B5 (850-880 nm)                                   | [192] |
|                              |       | Landsat-5 TM        | B1 (450-520 nm), B2 (520-600 nm), B3 (630-690 nm), B4 (760-900 nm) | [100] |
|                              |       | Landsat-8 OLI       | B2 (450-510 nm), B3 (530-590 nm), B5 (850-880 nm)                  | [99]  |
|                              |       | IRS-1A-LISS-I       | B1 (450-520 nm), B2 (520-590 nm), B3 (620-680 nm)                  | [119] |
|                              |       | Landsat-5 TM        | B1 (450-520 nm), B2 (520-600 nm), B3 (630-690 nm)                  | [101] |
|                              |       | Sentinel-3 OLCI     | R <sub>779</sub> , R <sub>754</sub> , R <sub>865</sub>             | [82]  |

Table A3. Selected remotely measurements of TUR using various sensors and spectral bands, band ratios, and band combinations

| Band Combination            |     | Sensor         | Band/Equation                   | Reference |
|-----------------------------|-----|----------------|---------------------------------|-----------|
| Ratio between green and red |     | Landsat-5 TM   | B3 (630-690 nm)/B2 (520-600 nm) | [58]      |
| Ratio between NIR and red   |     | AISA           | $R_{850}/R_{550}$               | [75]      |
| Single band                 | NIR | AISA           | $R_{714}$                       | [35]      |
|                             |     | AISA           | $R_{705-714}$                   | [67]      |
|                             | Red | Landsat-7 ETM+ | B3 (630-690 nm)                 | [32]      |
|                             |     | Landsat-5 TM   | B3 (630-690 nm)                 | [32]      |
|                             |     | Landsat-5 TM   | B3 (630-690 nm)                 | [33]      |
|                             |     | HICO           | $R_{646}$                       | [60]      |
|                             |     | Landsat-7 ETM+ | B3 (630-690 nm)                 | [155]     |

|                |  |                |                                                                                                          |       |
|----------------|--|----------------|----------------------------------------------------------------------------------------------------------|-------|
|                |  | Landsat-5 TM   | B3 (630-690 nm)                                                                                          | [155] |
| Multiple bands |  | Landsat-8 OLI  | B4 (630-670 nm), B5 (850-880 nm)                                                                         | [152] |
|                |  | Landsat-8 OLI  | B2 (450-510 nm), B4 (630-670 nm)                                                                         | [153] |
|                |  | ASTER Terra    | B1 (520-600 nm), B2 (630-690 nm), B3 (780-860 nm)                                                        | [150] |
|                |  | Landsat-5 TM   | B2 (520-600 nm), B3 (630-690 nm), B6 (10400-12500 nm), B7 (2080 – 2350 nm)                               | [98]  |
|                |  | Landsat-5 TM   | B1 (450-520 nm), B3 (630-690 nm)                                                                         | [102] |
|                |  | Landsat-5 TM   | B1 (450-520 nm), B3 (630-690 nm), B4 (760-900 nm)                                                        | [102] |
|                |  | Landsat-5 TM   | B2 (520-600 nm), B3 (630-690 nm)                                                                         | [102] |
|                |  | Landsat-5 TM   | B1 (450-520 nm), B3 (630-690 nm), B4 (760-900 nm)                                                        | [104] |
|                |  | Landsat-5 TM   | B1 (450-520 nm), B2 (520-600 nm), B3 (630-690 nm), B4 (760-900 nm), B5 (1550-1750 nm), B7 (2080-2350 nm) | [109] |
|                |  | PlanetScope    | B4 (547-583 nm), B6 (650-680 nm), B8 (845-885 nm)                                                        | [110] |
|                |  | Sentinel-2 MSI | B2 (460.2-525.2 nm), B4 (649.6-679.6 nm), B8 (780.3-885.3 nm), B12 (2115.4-2289.4)                       | [110] |
|                |  | Landsat-8 OLI  | B3 (525-600 nm), B4 (630-680 nm), B5 (850-880 nm), B7 (2110-2290 nm)                                     | [110] |
|                |  | ASTER Terra    | B1 (520-600 nm), B2 (630-690 nm), B3 (780-860 nm)                                                        | [150] |
|                |  | Sentinel-2 MSI | B3 (542.3-577.3 nm), B4 (649.6-679.6 nm), B5 (697.1-711.1 nm), B12 (2115.4-2289.4)                       | [156] |

Table A4. Selected remotely measurements of CDOM using various sensors and spectral bands, band ratios, and band combinations

37  
38

| Band Combination             |       | Sensor          | Band/Equation                   | Reference |
|------------------------------|-------|-----------------|---------------------------------|-----------|
| Ratio between green and red  |       | HICO            | $R_{670}/R_{490}$               | [60]      |
|                              |       | MODIS           | $R_{670}/R_{571}$               | [77]      |
|                              |       | EO-1 ALI        | B2 (525-605 nm)/B3 (630-690 nm) | [127,128] |
|                              |       | EO-1 ALI        | B2 (565 nm)/B3 (660 nm)         | [129]     |
|                              |       | SeaWiFS         | $R_{670}/R_{490}$               | [130]     |
|                              |       | Sentinel-2 MSI  | B3 (560 nm)/B4 (665 nm)         | [131]     |
|                              |       | VIIRS           | $R_{551}/R_{671}$               | [132]     |
|                              |       | Landsat-8 OLI   | B3 (525-600 nm)/B4 (630-680 nm) | [133]     |
|                              |       | Landsat-7 ETM+  | B2 (525-605 nm)/B3 (630-690 nm) | [115]     |
|                              |       | Landsat-5 TM    | B2 (520-600 nm)/B3 (630-690 nm) | [134]     |
| Ratio between red and blue   |       | Sentinel-3 OLCI | $R_{665}/R_{550}$               | [82]      |
|                              |       | Sentinel-2 MSI  | $R_{665}/R_{490}$               | [82]      |
| Ratio between blue and green |       | ALOS-AVNIR-2    | B1 (420-500 nm)/B2 (520-600 nm) | [90]      |
|                              |       | AISA            | $R_{440}/R_{575}$               | [75]      |
|                              |       | MODIS           | $R_{488}/R_{555}$               | [142]     |
|                              |       | SeaWiFS         | $R_{412}/R_{555}$               | [135,136] |
| Single band                  | Green | MERIS           | $R_{510}/R_{560}$               | [142]     |
|                              |       | SeaWiFS         | $R_{510}/R_{555}$               | [142]     |
|                              | Blue  | MIVIS           | $R_{440}$                       | [92]      |

|                |                                                   |                      |                  |                                                                    |
|----------------|---------------------------------------------------|----------------------|------------------|--------------------------------------------------------------------|
|                |                                                   | EO-1 Hyperion        | R <sub>440</sub> | [83]                                                               |
|                |                                                   | SeaWiFS + MODIS-Aqua | R <sub>443</sub> | [137]                                                              |
|                |                                                   | MODIS                | R <sub>380</sub> | [138]                                                              |
|                |                                                   | MODIS                | R <sub>412</sub> | [142]                                                              |
|                |                                                   | MERIS                | R <sub>412</sub> | [142]                                                              |
|                |                                                   | SeaWiFS              | R <sub>400</sub> | [136]                                                              |
|                |                                                   | SeaWiFS              | R <sub>440</sub> | [139]                                                              |
|                |                                                   | SeaWiFS              | R <sub>410</sub> | [140]                                                              |
|                |                                                   | SeaWiFS              | R <sub>412</sub> | [141,142]                                                          |
|                |                                                   | MODIS Aqua           | R <sub>443</sub> | [143,144]                                                          |
|                |                                                   | HICO                 | R <sub>440</sub> | [145]                                                              |
|                |                                                   | VIIRS                | R <sub>412</sub> | [132]                                                              |
|                |                                                   | ASTER                | R <sub>440</sub> | [146]                                                              |
|                |                                                   | Sentinel-2A          | R <sub>440</sub> | [147]                                                              |
|                |                                                   | Multiple bands       | Landsat-5 TM     | B1 (450-520 nm), B2 (520-600 nm), B3 (630-690 nm), B4 (760-900 nm) |
| Landsat-7 ETM+ | B2 (525-605 nm), B3 (630-690 nm), B4 (775-900 nm) |                      | [115]            |                                                                    |
| Landsat-7 ETM+ | B1 (450-515 nm), B2 (525-605 nm), B3 (630-690 nm) |                      | [115]            |                                                                    |
| Landsat-8 OLI  | B3 (525-600 nm), B4 (630-680 nm), B5 (845-885 nm) |                      | [115]            |                                                                    |
| Landsat-8 OLI  | B1 (433-453 nm), B2 (450-515 nm), B5 (845-885 nm) |                      | [115]            |                                                                    |

Table A5. Selected remotely measurements of transparency (SDD) using various sensors and spectral bands, band ratios, and band combinations

39  
40

| Band Combination             |     | Sensor         | Band/Equation                                         | Reference   |
|------------------------------|-----|----------------|-------------------------------------------------------|-------------|
| Ratio between red and green  |     | Landsat-5 TM   | B3 (630-690 nm)/B2 (520-600 nm)                       | [57,58]     |
|                              |     | ALOS-AVNIR-2   | B3 (610-690 nm)/B2 (520-600 nm)                       | [90]        |
| Ratio between NIR and red    |     | AISA           | $(R_{670-677}-R_{747-755})/(R_{699-705}-R_{747-755})$ | [67]        |
|                              |     | MERIS          | $R_{708}/R_{664}$                                     | [112]       |
| Ratio between NIR and green  |     | AISA           | $(R_{521}-R_{781})/(R_{700}-R_{781})$                 | [35]        |
| Ratio between blue and red   |     | PROBA-CHRIS    | $(R_{410}+R_{651})/R_{680}$                           | [59]        |
|                              |     | Landsat-7 ETM+ | B1 (450-515 nm)/B3 (630-690 nm)                       | [88]        |
| Ratio between blue and green |     | Landsat-5 TM   | B1 (450-520 nm)/B2 (520-600 nm)                       | [103]       |
|                              |     | PlanetScope    | B2 (465-515 nm)/B3 (513-549 nm)                       | [113]       |
| Single band                  | Red | Landsat-5 TM   | B3 (630-690 nm)                                       | [33,95,114] |
|                              |     | MODIS          | B1 (620-670 nm)                                       | [93]        |
|                              | NIR | MODIS          | R <sub>710</sub>                                      | [77]        |
| Multiple bands               |     | IKONOS         | B1 (450-530 nm), B2 (520-610 nm), B3 (640-720 nm)     | [97]        |
|                              |     | Landsat-8 OLI  | B1 (433-453 nm), B2 (450-515 nm), B4 (630-680 nm)     | [115]       |
|                              |     | Landsat-8 OLI  | B2 (450-515 nm), B4 (630-680 nm)                      | [115]       |
|                              |     | Landsat-7 ETM+ | B1 (450-515 nm), B3 (630-690 nm)                      | [115,116]   |
|                              |     | Landsat-5 TM   | B1 (450-520 nm), B2 (520-600 nm), B3 (630-690 nm)     | [57,118]    |

|  |                |                                                                                    |                   |
|--|----------------|------------------------------------------------------------------------------------|-------------------|
|  | IRS-1A-LISS-I  | B1 (450-520 nm), B2 (520-590 nm), B3 (620-680 nm)                                  | [119]             |
|  | Landsat-5 TM   | B1 (450-520 nm), B3 (630-690 nm)                                                   | [101,102,120–125] |
|  | Landsat-5 TM   | B1 (450-520 nm), B4 (760-900 nm)                                                   | [102]             |
|  | Landsat-5 TM   | B1 (450-520 nm), B2 (520-600 nm), B4 (760-900 nm)                                  | [102]             |
|  | IKONOS         | B1 (445-516 nm), B3 (632-698 nm)                                                   | [124]             |
|  | Landsat-5 MSS  | B1 (500-600 nm), B2 (600-700 nm)                                                   | [122,123]         |
|  | Landsat-7 ETM+ | B3 (630-690 nm), B7 (2090-2350 nm)                                                 | [126]             |
|  | Landsat-5 TM   | B1 (450-520 nm), B2 (520-600 nm)                                                   | [87]              |
|  | PlanetScope    | B2 (465-515 nm), B6 (650-680 nm), B8 (845-885 nm)                                  | [110]             |
|  | Sentinel-2 MSI | B3 (542.3-577.3 nm), B4 (649.6-679.6 nm), B7 (773.3-792.3 nm), B12 (2115.4-2289.4) | [110]             |
|  | Landsat-8 OLI  | B3 (525-600 nm), B4 (630-680 nm), B5 (845-885 nm)                                  | [110]             |

Table A6. Selected remotely measurements of WT using various sensors and spectral bands, band ratios, and band combinations

| Band Combination |     | Sensor                                     | Band/Equation                                                                                                                                                                                                     | Reference             |
|------------------|-----|--------------------------------------------|-------------------------------------------------------------------------------------------------------------------------------------------------------------------------------------------------------------------|-----------------------|
| Single band      | TIR | MODIS Terra                                | B29 (8400-8700 nm)                                                                                                                                                                                                | [193]                 |
|                  |     | Landsat-7 ETM+                             | B6 (10400-12500 nm)                                                                                                                                                                                               | [193–199]             |
|                  |     | Landsat-5 TM                               | B6 (10400-12500 nm)                                                                                                                                                                                               | [87,103,199, 200,204] |
|                  |     | Landsat-8 TIRS                             | B10 (10600-11190 nm)                                                                                                                                                                                              | [201]                 |
| Multiple bands   |     | ASTER                                      | B11 (8475-8825 nm), B13 (10250-10950 nm)                                                                                                                                                                          | [193]                 |
|                  |     | ASTER                                      | B10 (8125-8475 nm), B11 (8475-8825 nm), B12 (8925-9275 nm), B13 (10250-10950 nm), B14 (10950-11650 nm)                                                                                                            | [197]                 |
|                  |     | MASTER                                     | B43 (8560-8940 nm), B44 (9010-9410 nm), B46 (10080-10480 nm), B47 (10430-11080 nm), B48 (11060-11760 nm)                                                                                                          | [193]                 |
|                  |     | MASTER                                     | B41 (7740-8140 nm), B42 (8170-8570 nm), B43 (8560-8940 nm), B44 (9010-9410 nm), B45 (9660-10060 nm), B46 (10080-10480 nm), B47 (10430-11080 nm), B48 (11060-11760 nm), B49 (12080-12580 nm), B50 (12800-13300 nm) | [197]                 |
|                  |     | NOAA-9, -11, -12, -14, -16, -17, -19 AVHRR | B4 (1030-1130 nm), B5 (1150–1250 nm)                                                                                                                                                                              | [196,202,203]         |
|                  |     | NOAA-12 AVHRR                              | B4 (1030-1130 nm), B5 (1150–1250 nm)                                                                                                                                                                              | [198]                 |
|                  |     | MODIS Terra                                | B31 (10780-11280 nm), B32 (11770-12270 nm)                                                                                                                                                                        | [204–208,213]         |
|                  |     | Landsat-8 TIRS                             | B10 (10600-11190 nm), B11 (11500-12510 nm)                                                                                                                                                                        | [209]                 |
|                  |     | MODIS Terra                                | B29 (8400-8700 nm), B31 (10780-11280 nm), B32 (11770-12270 nm)                                                                                                                                                    | [210]                 |

|  |                   |                                                                                 |       |
|--|-------------------|---------------------------------------------------------------------------------|-------|
|  | ASTER Terra       | B8 (2295-2365 nm), B10 (8125-8475 nm), B11 (8475-8825 nm), B13 (10250-10950 nm) | [150] |
|  | NOAA-17/-18 AVHRR | B4 (1030-1130 nm), B5 (1150-1250 nm)                                            | [211] |
|  | NOAA-17/-18 AVHRR | B3B (3550-3930 nm), B4 (1030-1130 nm), B5 (1150-1250 nm)                        | [211] |
|  | MODIS Terra       | B31 (10780-11280 nm), B32 (11770-12270 nm)                                      | [212] |

Table A7. Selected remotely measurements of SS using various sensors and spectral bands, band ratios, and band combinations

| Band Combination |        | Sensor          | Band/Equation                                                                                                               | Reference     |
|------------------|--------|-----------------|-----------------------------------------------------------------------------------------------------------------------------|---------------|
| Single band      | L-band | SMOS MIRAS      | L-band (1400–1427 MHz)                                                                                                      | [157–163]     |
|                  |        | Aquarius/SAC-D  | L-band (1.413 GHz)                                                                                                          | [164,165]     |
|                  |        | STARRS          | L-band (1.4 GHz)                                                                                                            | [166–169]     |
|                  |        | PLMR            | L-band (1.413 GHz)                                                                                                          | [170]         |
|                  |        | SLFMR           | L-band (1.4 GHz)                                                                                                            | [167,171–173] |
|                  |        | PALS            | L-band (1.413 GHz)                                                                                                          | [174–176]     |
|                  |        | 2D-STAR         | L-band (1.413 GHz)                                                                                                          | [177]         |
|                  |        | ESTAR           | L-band (1.413 GHz)                                                                                                          | [177,178]     |
|                  |        | CAROLS          | L-band (1.413 GHz)                                                                                                          | [179]         |
| Multiple bands   |        | MODIS Aqua      | B1 (620-670 nm), B2 (841-876 nm), B3 (459-479 nm), B4 (545-565 nm), B5 (1230-1250 nm), B6 (1628-1652 nm), B7 (2105-2155 nm) | [180]         |
|                  |        | EOS Aqua AMSR-E | 6.9 and 10.7 GHz                                                                                                            | [181]         |
|                  |        | ASTER Terra     | B3 (780-860 nm), B5 (2145-2185 nm), B7 (2235-2285 nm)                                                                       | [150]         |

Table A8. Selected remotely measurements of EC using various sensors and spectral bands, band ratios, and band combinations

| Band Combination            |     | Sensor        | Band/Equation                                                                         | Reference |
|-----------------------------|-----|---------------|---------------------------------------------------------------------------------------|-----------|
| Ratio between green and red |     | Landsat-8 OLI | B3 (525-600 nm)/B4 (630-680 nm)                                                       | [148]     |
| Single band                 | Red | Landsat-8 OLI | B4 (630-680 nm)                                                                       | [149]     |
| Multiple bands              |     | ASTER Terra   | B3 (780-860 nm), B4 (1600-1700 nm), B8 (2295-2365 nm)                                 | [150]     |
|                             |     | Landsat-8 OLI | B2 (450-510 nm), B3 (525-600 nm), B4 (630-680 nm)                                     | [151]     |
|                             |     | Landsat-5 TM  | B1 (450-520 nm), B2 (520-600 nm), B3 (630-690 nm)                                     | [151]     |
|                             |     | Landsat-8 OLI | B2 (450-510 nm), B3 (525-600 nm), B4 (630-680 nm), B6 (1570-1650 nm)                  | [152]     |
|                             |     | Landsat-8 OLI | B1 (430-450 nm), B2 (450-510 nm), B3 (525-600 nm), B5 (850-880 nm), B6 (1570-1650 nm) | [153]     |



---

|  |             |                                                   |       |
|--|-------------|---------------------------------------------------|-------|
|  | WorldView-2 | B2 (450-510 nm), B6 (705-745 nm), B7 (770-895 nm) | [154] |
|--|-------------|---------------------------------------------------|-------|
